# Supplementary material
Source: publisher figshare collection journal article supplement (https://acs.figshare.com/ndownloader/files/4208767)
Supplement: Supplementary file 1 [file 4208767]

# A Benzo-21-Crown-7/Secondary Ammonium Salt [c2]Daisy Chain

Bo Zheng, Mingming Zhang, Shengyi Dong, Jiyong Liu, Feihe Huang\*

Department of Chemistry, Zhejiang University, Hangzhou, VA 310027 P. R. China. Fax:

+86-571-8795-1895; Tel: +86-571-8795-3189; Email address: fhuang@zju.edu.cn.

## Supporting Information (18 pages)

|     |                                                                                                        |     |
|-----|--------------------------------------------------------------------------------------------------------|-----|
| 1.  | Materials and methods                                                                                  | S2  |
| 2.  | Synthesis of compound <b>3</b>                                                                         | S2  |
| 3.  | Synthesis of compound <b>1</b>                                                                         | S6  |
| 4.  | Comparison of the structures of a [2]rotaxane and the [c2]daisy chain in the solid state               | S11 |
| 5.  | MALDI-TOF spectrum of <b>1</b>                                                                         | S12 |
| 6.  | Partial proton NMR spectra of <b>1</b> , B21C7 and a model secondary ammonium hexafluorophosphate salt | S13 |
| 7.  | Partial $^1\text{H}$ - $^1\text{H}$ COSY NMR spectrum of <b>1</b>                                      | S14 |
| 8.  | Partial NOSEY NMR spectrum of <b>1</b>                                                                 | S15 |
| 9.  | Partial proton NMR spectra of the complexation of <b>1</b> controlled by pH value                      | S16 |
| 10. | Partial proton NMR spectra of the complexation of <b>1</b> controlled by $\text{K}^+$                  | S17 |
| 11. | X-ray analysis data of <b>1</b>                                                                        | S18 |
|     | References                                                                                             | S18 |

## 1. Materials and methods

All reagents were commercially available and used as supplied without further purification. Compound **2** and model compounds were prepared according to the published procedures.<sup>S1,S2</sup> <sup>1</sup>H NMR spectra were collected on a temperature-controlled 400 MHz or 500 MHz spectrometer. <sup>13</sup>C NMR spectra were recorded on a Bruker AVANCE DMX-500 spectrometer. MALDI-TOF spectrometry was performed on a 4700 MALDI-TOF-TOF (Applied Biosystems, U.S.A). Low-resolution electrospray ionization (LRESI) mass spectra were obtained on a Bruker Esquire 3000 plus mass spectrometer (Bruker-Franzen Analytik GmbH Bremen, Germany) equipped with ESI interface and ion trap analyzer. High-resolution electrospray ionization (HRESI) mass spectra were obtained on a Bruker 7-Tesla FT-ICR mass spectrometer equipped with an electrospray source (Billerica, MA, USA).

## 2. Synthesis of compound 3

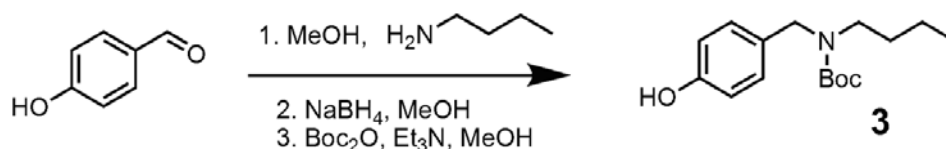

A solution of 4-hydroxybenzaldehyde (2.44 g, 20.0 mmol) and butan-1-amine (1.46 g, 20.0 mmol) in MeOH (50 mL) was stirred at room temperature overnight. Then NaBH<sub>4</sub> (0.91 g) was added. The reaction was quenched by addition of water. The resulting solution was extracted with dichloromethane (3 × 50 mL). The organic layer was dried over anhydrous Na<sub>2</sub>SO<sub>4</sub> and evaporated to afford a crude product. The mixture of the crude product, di-*tert*-butyl dicarbonate (4.59 mL, 20.0 mmol) and Et<sub>3</sub>N (2.79 mL, 20.0 mmol) in MeOH (100 mL) was stirred at room temperature overnight. The solvent was removed and the residue was purified by column chromatography on silica gel (ethyl acetate : petroleum ether = 1 : 30, v/v) to afford **3** as a white solid (3.63 g, 65%), mp 54–56 °C. The proton NMR spectrum of **3** is shown in Figure S1. <sup>1</sup>H NMR (500 MHz, acetone-*d*<sub>6</sub>, room temperature)  $\delta$  (ppm): 7.10 (d, *J* = 4.0 Hz, 2H), 6.77 (d, *J* = 4.0 Hz, 2H), 4.32 (s, 2H), 3.11 (br, 2H),

1.41–1.48 (m, 11H), 1.21–1.28 (m, 2H), 0.85 (t,  $J = 4.0$  Hz, 3H). The  $^{13}\text{C}$  NMR spectrum of **1** is shown in Figure S2.  $^{13}\text{C}$  NMR (125 MHz, acetone- $d_6$ , room temperature)  $\delta$  (ppm): 157.35, 130.63, 129.75, 79.37, 49.99, 46.51, 30.90, 28.48, 20.64, 14.15. LRESIMS is shown in Figure S3:  $m/z$  581.3  $[2\text{M} + \text{Na}]^+$  (100%). HRESIMS (Figure S4):  $m/z$  calcd for  $[\text{M}]^+$   $\text{C}_{16}\text{H}_{25}\text{NO}_3$ , 279.1829; found 279.1837, error 2.9 ppm.

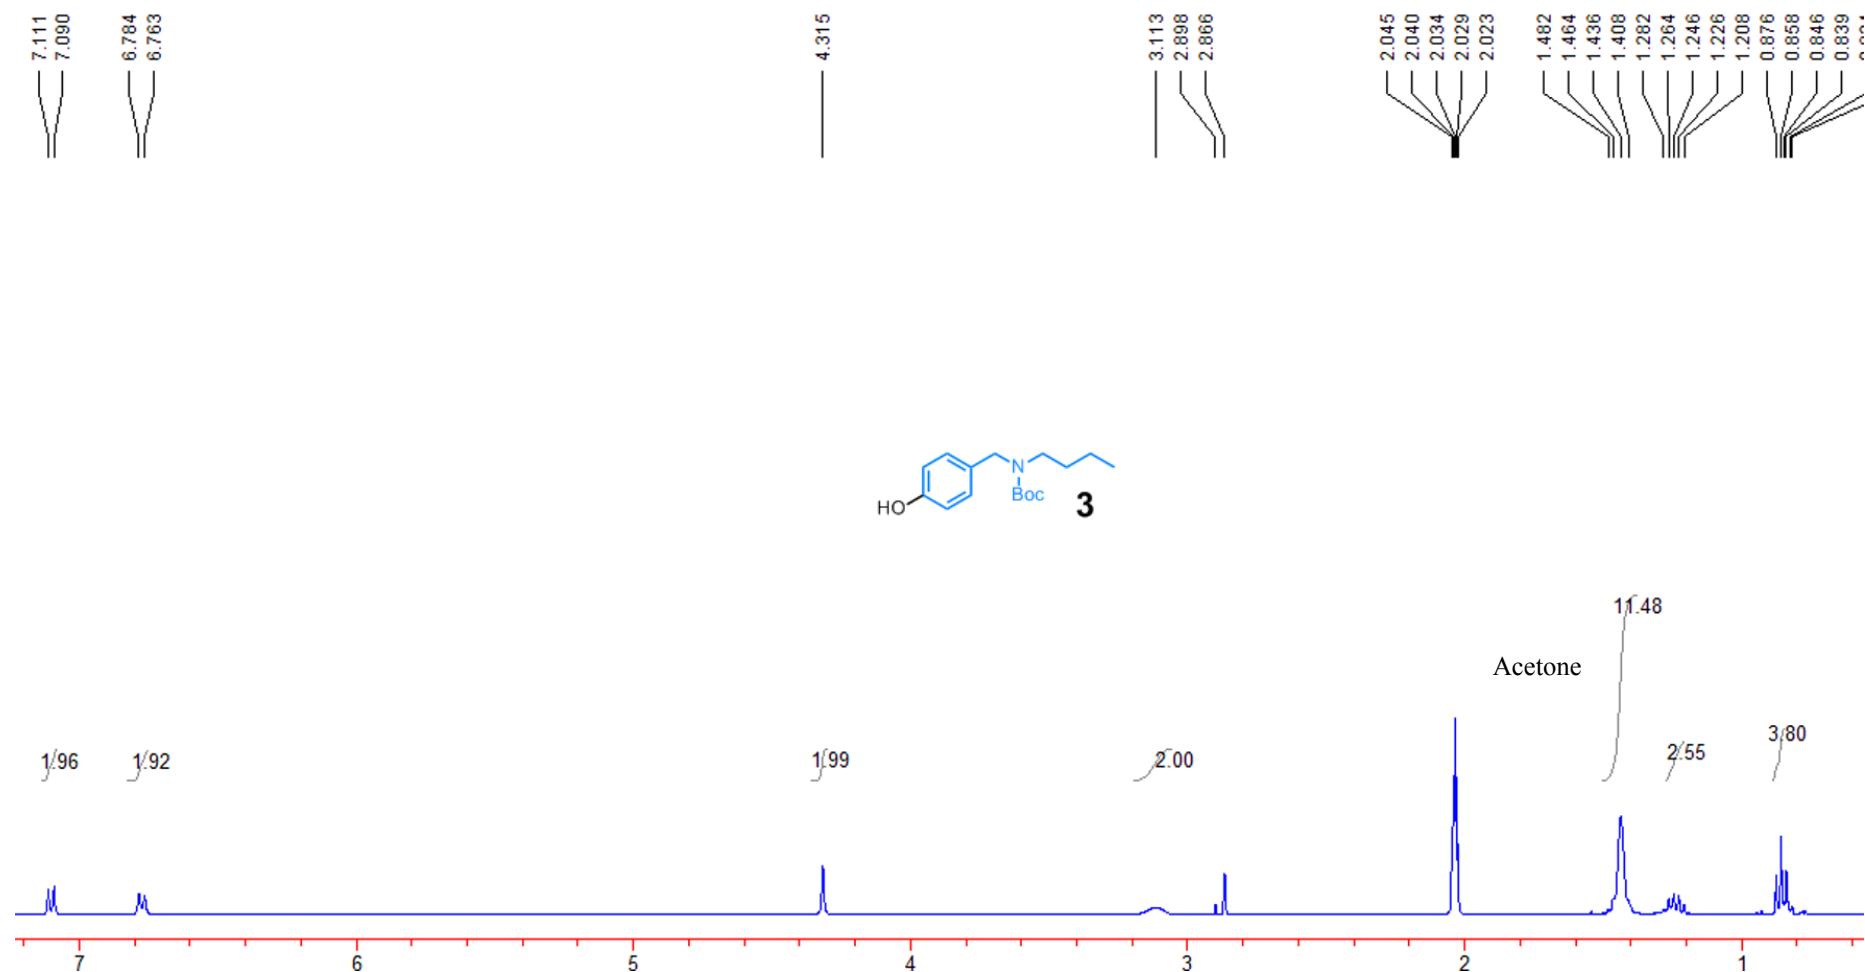

**Figure S1.** <sup>1</sup>H NMR spectrum (500 MHz, acetone-*d*<sub>6</sub>, room temperature) of **3**.

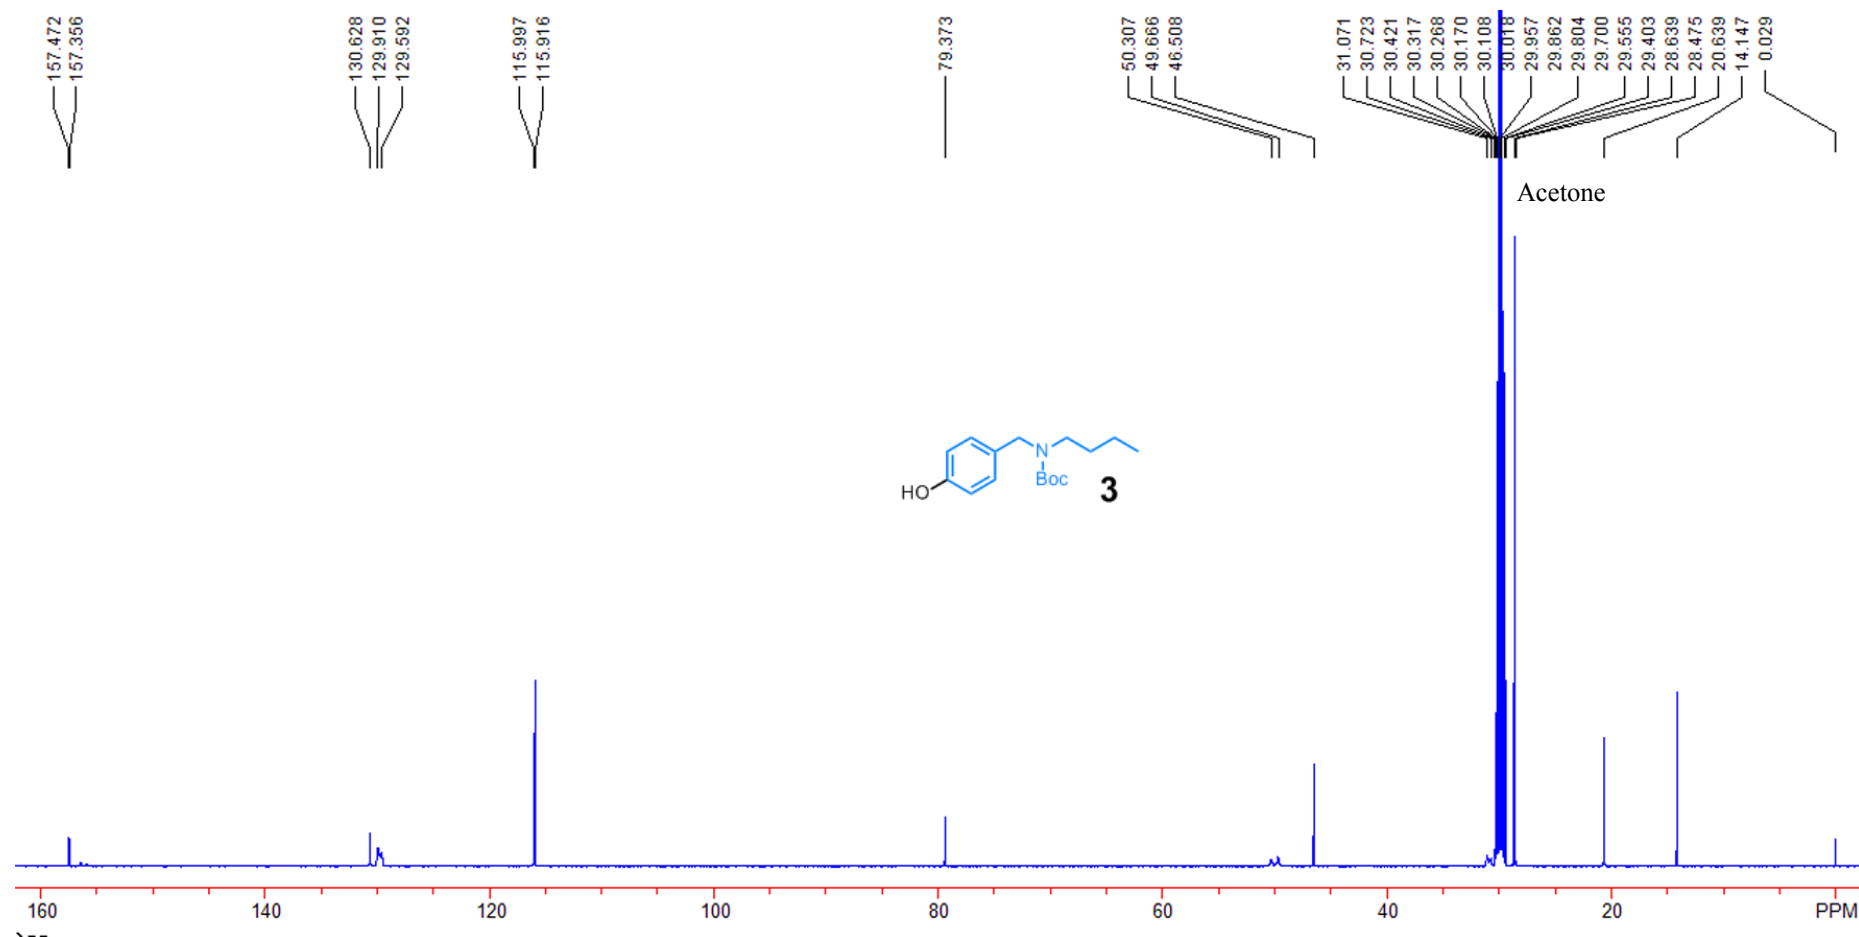

**Figure S2.** <sup>13</sup>C NMR spectrum (125 MHz, acetone-*d*<sub>6</sub>, room temperature) of **3**.

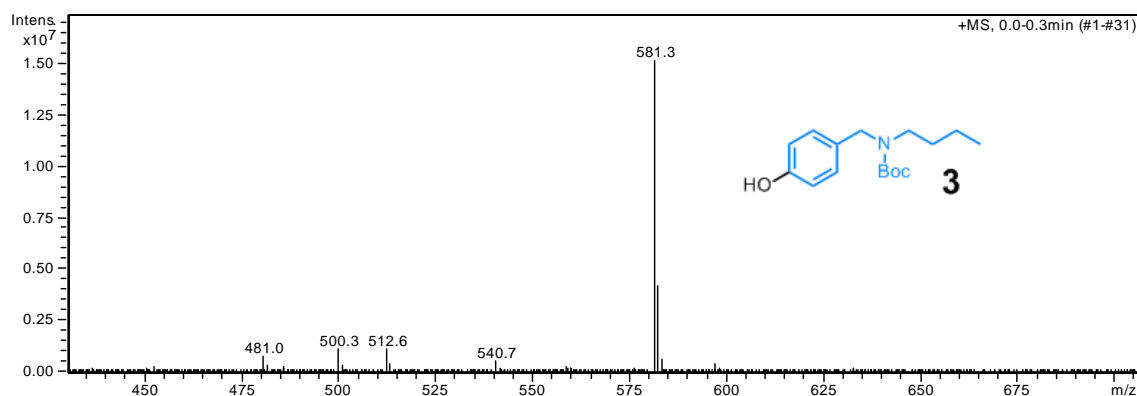

**Figure S3.** Electrospray ionization mass spectrum of **3**. Assignment of the main peak:  $m/z$  581.31  $[2M + Na]^+$  (100%).

Tolerance = 1.0 mDa / DBE: min = -1.5, max = 50.0  
Element prediction: Off

Monoisotopic Mass, Odd and Even Electron Ions  
173 formula(e) evaluated with 1 results within limits (up to 50 best isotopic matches for each mass)  
Elements Used:  
C: 0-100 H: 0-300 N: 0-6 O: 0-6  
28-Sep-2011 GCT Premier ZJU  
zb-dsy 1665 (6.107)

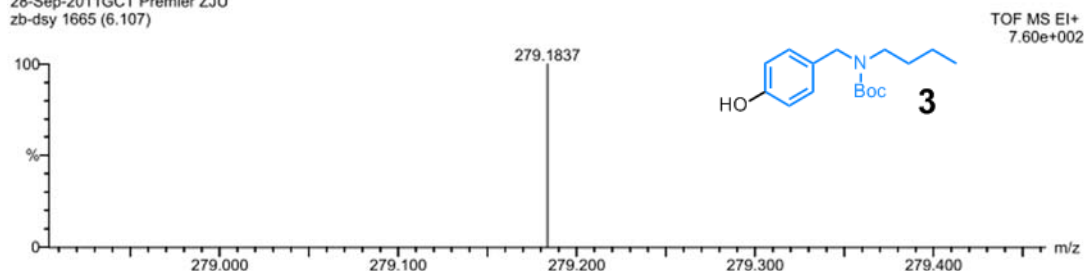

| Minimum: |            |      |     | -1.5 |           |         |          |
|----------|------------|------|-----|------|-----------|---------|----------|
| Maximum: | 1.0        | 10.0 |     | 50.0 |           |         |          |
| Mass     | Calc. Mass | mDa  | PPM | DBE  | i-FIT     | Formula |          |
| 279.1837 | 279.1834   | 0.3  | 1.1 | 5.0  | 5546386.0 | C16     | H25 N 03 |

**Figure S4.** High-resolution TOF mass spectrum of **3**.

### 3. Synthesis of compound **1**

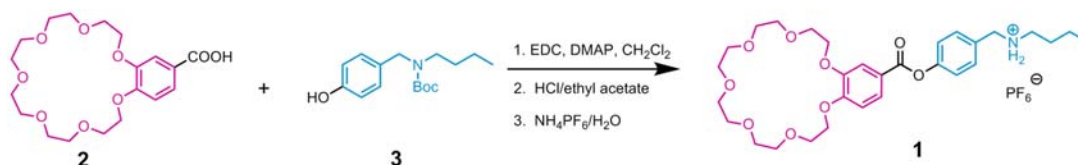

A solution of **2** (175 mg, 0.43 mmol), **3** (121 mg, 0.43 mmol), EDC (83.3 mg, 0.43 mmol) and DMAP (53.0 mg, 0.43 mmol) in dichloromethane (30 mL) was stirred for 24 h at room temperature. The solvent was removed to give a crude product. The

crude product was dissolved in 10% HCl/ethyl acetate (25 mL) and stirred overnight. The white solid was filtered, washed with ethyl acetate thoroughly, and dissolved in warm deionized water (50 mL). The saturated aqueous solution of  $\text{NH}_4\text{PF}_6$  was added to afford a white precipitate, which was filtered off and washed with deionized water to afford monomer **1** as a white solid (182 mg, 60%), mp 115–117 °C. The proton NMR spectrum of **1** is shown in Figure S5.  $^1\text{H}$  NMR (500 MHz,  $\text{DMSO}-d_6$ , room temperature)  $\delta$  (ppm): 8.50–8.80 (br, 2H), 7.75–7.79 (m, 1H), 7.55–7.60 (m, 3H), 7.37 (d,  $J = 8.5$  Hz, 2H), 7.17 (d,  $J = 9.0$  Hz, 1H), 4.20–4.24 (m, 2H), 4.15–4.20 (m, 4H), 3.76–3.82 (m, 4H), 3.65–3.47 (m, 16H), 2.94 (t,  $J = 7.5$  Hz, 2H), 1.57–1.63 (m, 2H), 1.32–1.38 (m, 2H), 0.90 (t,  $J = 7.5$  Hz, 3H). The  $^{13}\text{C}$  NMR spectrum of **1** is shown in Figure S6.  $^{13}\text{C}$  NMR (125 MHz,  $\text{DMSO}-d_6$ , room temperature)  $\delta$  (ppm): 164.65, 153.59, 151.66, 148.32, 131.73, 130.08, 124.75, 122.82, 121.21, 114.05, 112.87, 70.83, 70.70, 70.66, 70.59, 70.33, 69.27, 69.15, 69.03, 50.00, 46.95, 27.90, 19.72, 13.93. LRESIMS is shown in Figure S7:  $m/z$  562.1  $[\text{M} - \text{PF}_6]^+$  (100%). HRESIMS (Figure S8):  $m/z$  calcd for  $[\text{M} - \text{PF}_6]^+$   $\text{C}_{30}\text{H}_{44}\text{NO}_9$ , 562.3011; found 562.3021, error 1.8 ppm.

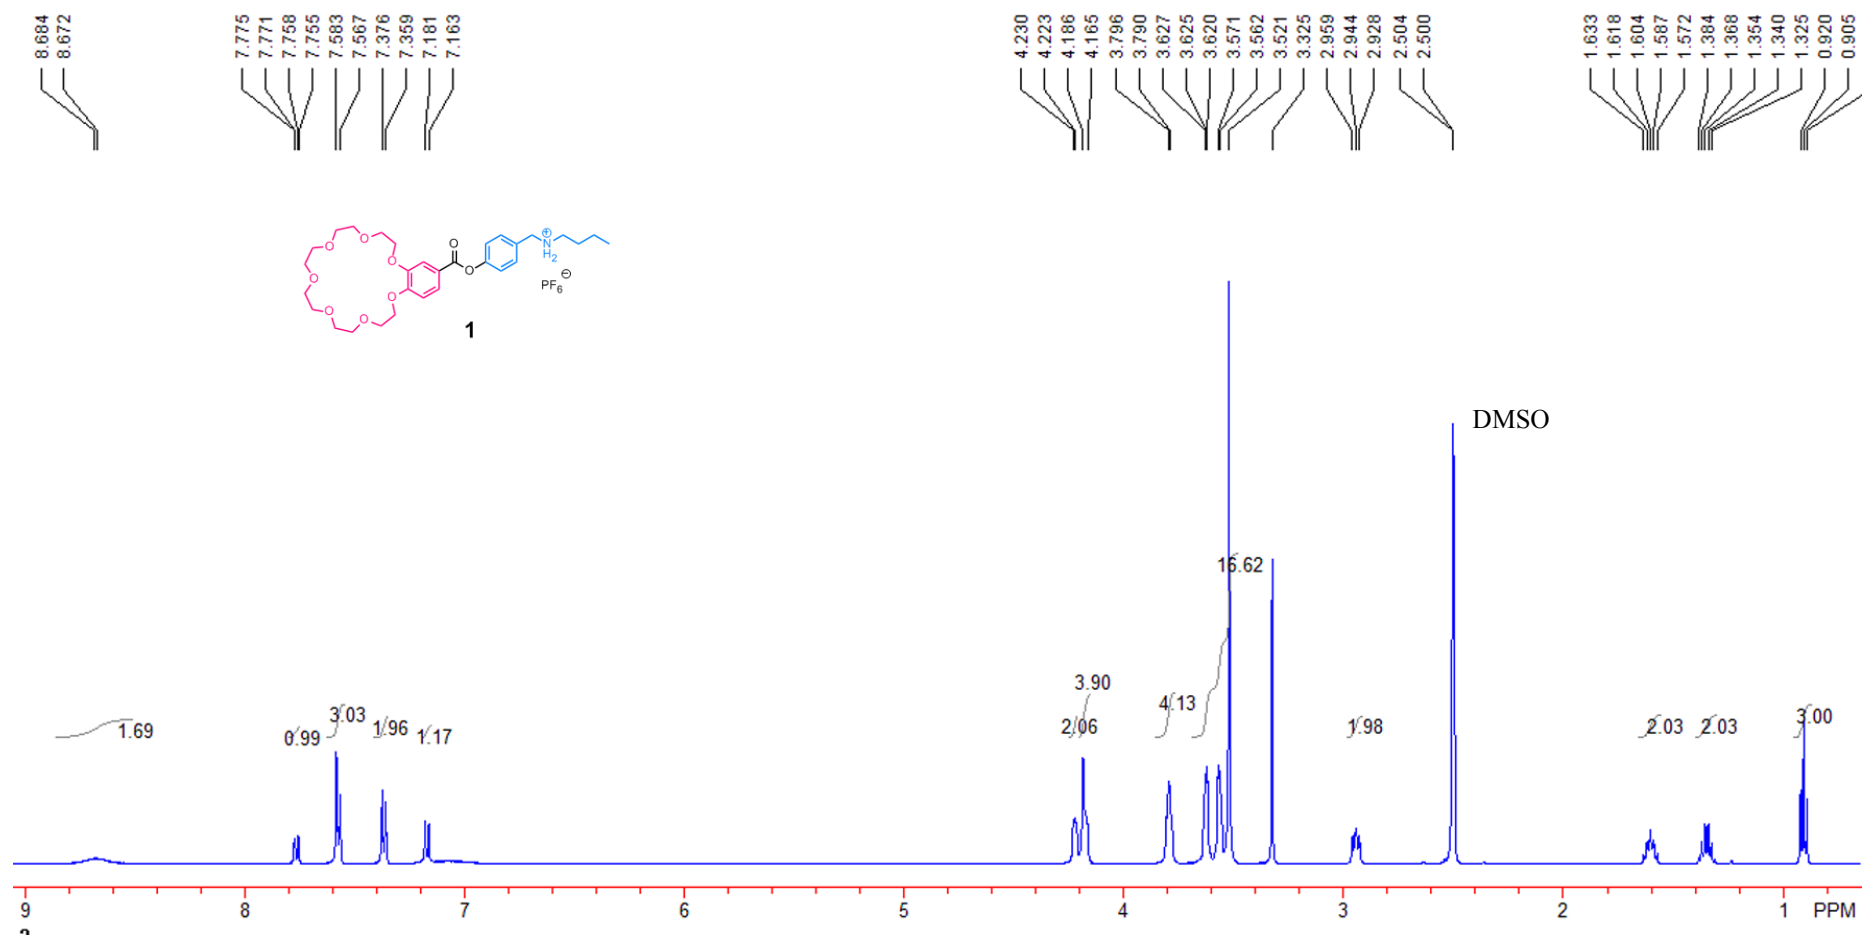

**Figure S5.** <sup>1</sup>H NMR spectrum (500 MHz, DMSO-*d*<sub>6</sub>, room temperature) of **1**.



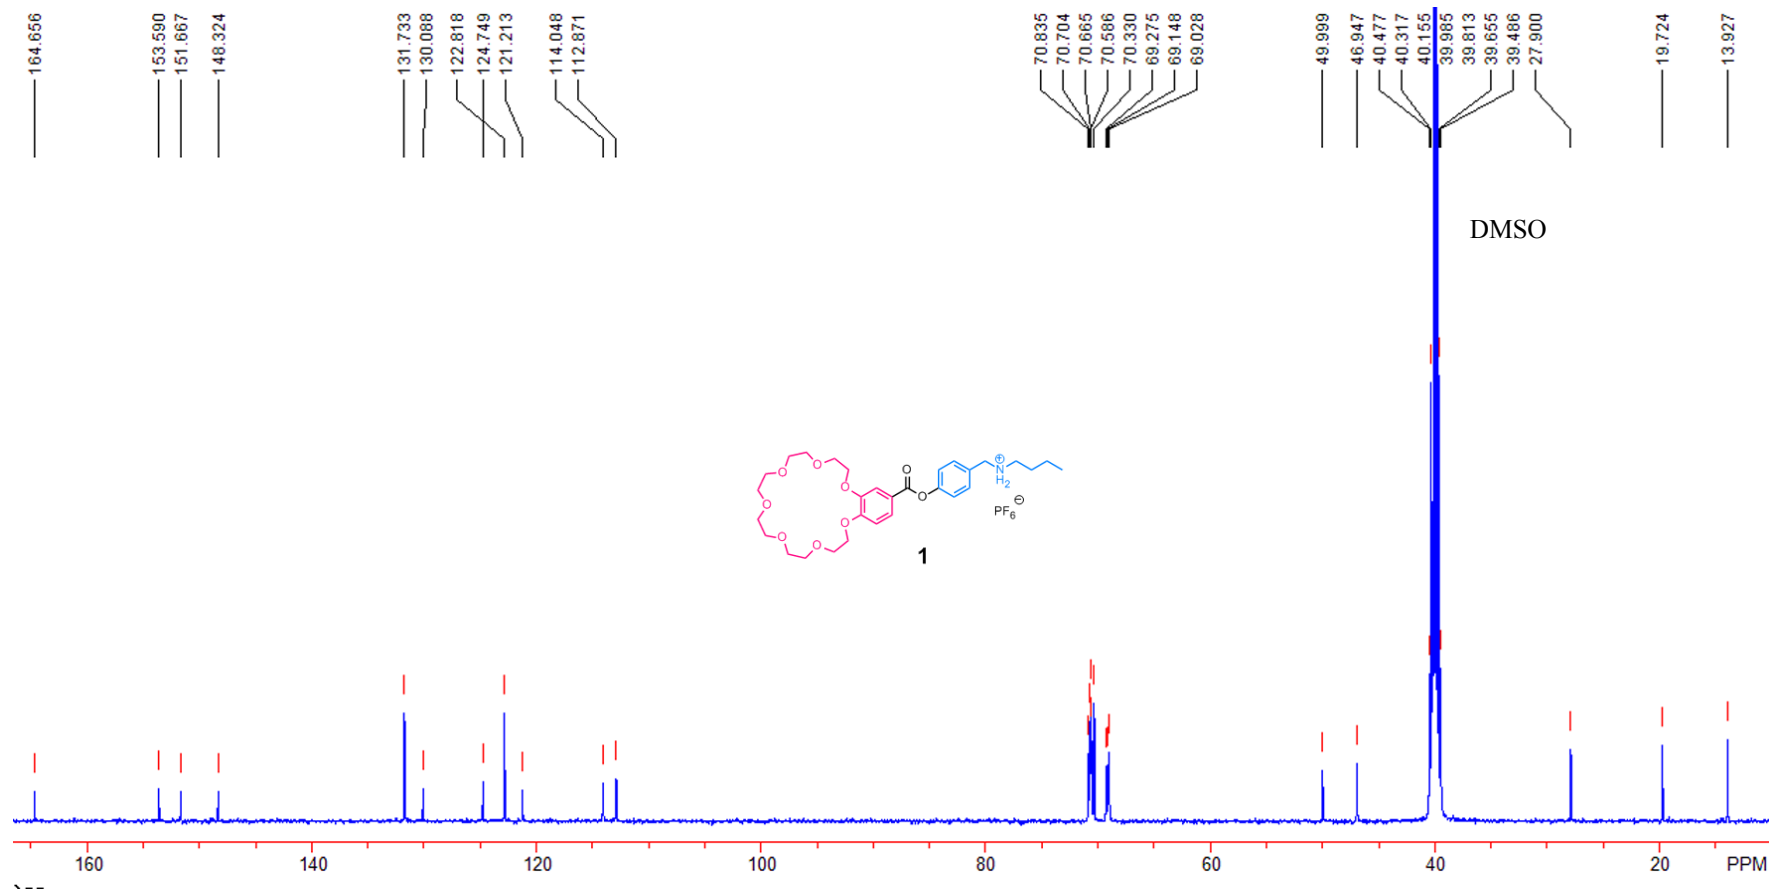

**Figure S6.**  $^{13}\text{C}$  NMR spectrum (125 MHz,  $\text{DMSO}-d_6$ , room temperature) of **1**.

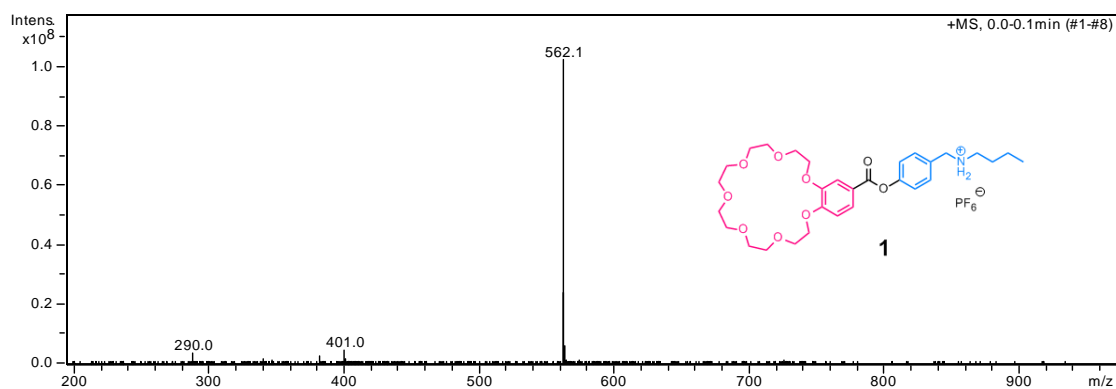

**Figure S7.** Electrospray ionization mass spectrum of **1**. Assignment of the main peak:  $m/z$  562.1  $[\text{M} - \text{PF}_6]^+$  (100%).

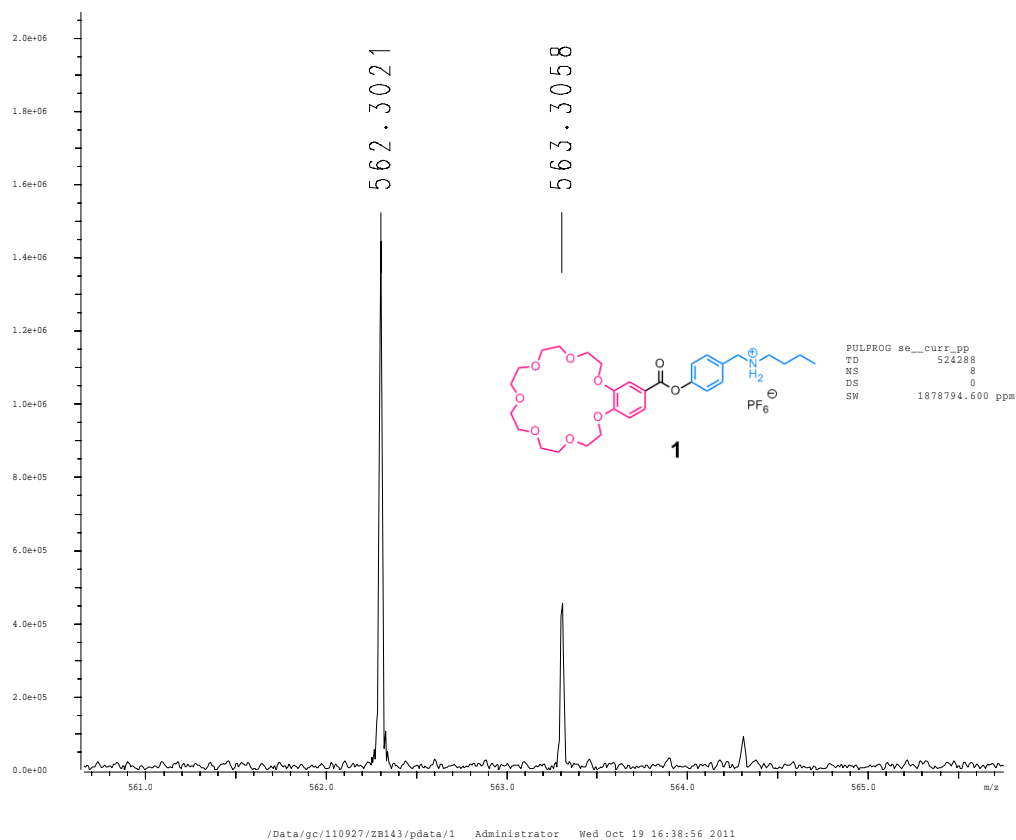

**Figure S8.** High-resolution ESI-MS spectra of **1**.

4. Comparison of the structures of a [2]rotaxane<sup>S1</sup> and the [c2]daisy chain in the solid state

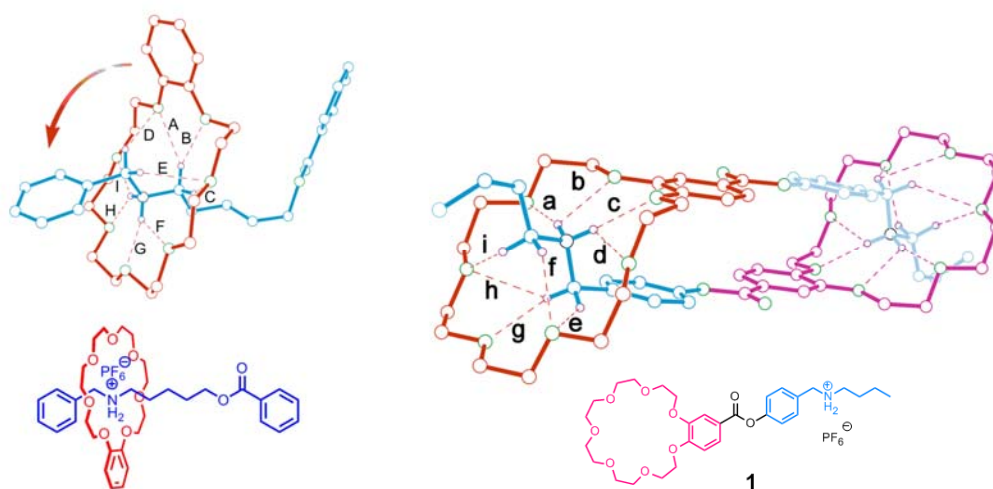

**Figure S9.** Crystal structure of the [2]rotaxane<sup>S1</sup> (left) and the [c2]daisy chain **1**<sub>2</sub> (right). A PF<sub>6</sub> counterion, and hydrogens except the ones involved in hydrogen bonding have been omitted for clarity. **B21C7** parts are red or magenta, secondary ammonium salt parts are blue or light blue, hydrogens are purple, oxygens are green, and nitrogens are black. Hydrogen-bond parameters: H···O distances (Å), C(N)-H···O angles (deg) **A**, 2.48, 152; **B**, 2.48, 122; **C**, 2.43, 150; **D**, 2.56, 144; **E**, 2.72, 144; **F**, 2.50, 129; **G**, 2.04, 154; **H**, 2.11, 140; **I**, 2.33, 139.<sup>S1</sup> From these two crystal structures, the benzene ring of B21C7 (left) flipped over to participate in face-to-face  $\pi$ -stacking interactions in order to stabilize the dimer structure (right). Both threaded structures are stabilized by [N<sup>+</sup>-H···O] and [C-H···O] hydrogen bonds. All oxygen atoms of the polyether rings of B21C7 and the ammonium and closest methylene hydrogens participate in the stabilization of the threaded structures.

## 5. MALDI-TOF spectrum of **1**

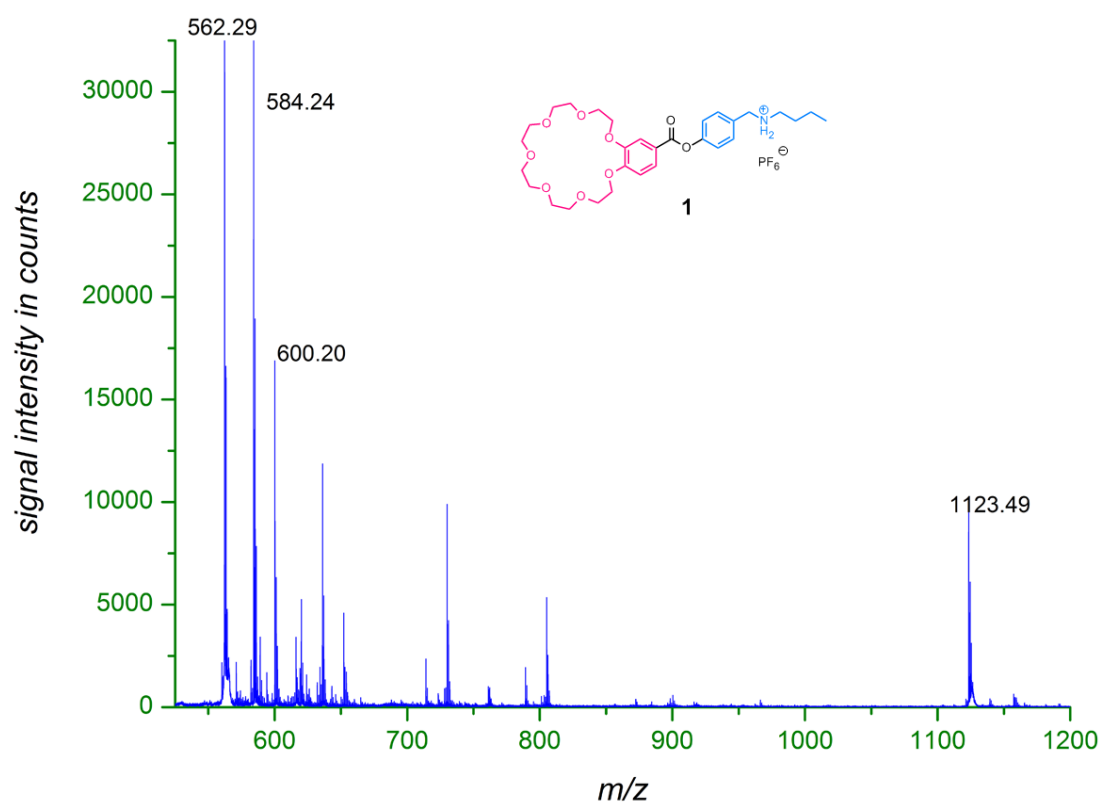

**Figure S10.** MALDI-TOF mass spectrum of **1**. The spectrum was measured in the positive-ion mode using  $\alpha$ -cyano-4-hydroxycinnamic acid (CHCA) as the matrix and acetonitrile as the solvent. The spectrum revealed the existence of the dimer structure of **1**,  $m/z$  1123.49 (25%), corresponding to  $[\mathbf{1}_2 - \text{HPF}_6 - \text{PF}_6]^+$ . The other main peaks at 562.29 (100%), 584.24 (98%) and 600.20 (57%), corresponding to  $[\mathbf{1} - \text{PF}_6]^+$ ,  $[\mathbf{1} - \text{HPF}_6 + \text{Na}]^+$  and  $[\mathbf{1} - \text{HPF}_6 + \text{K}]^+$ , respectively.

6. Partial proton NMR spectra of **1**, B21C7 and a model secondary ammonium hexafluorophosphate salt

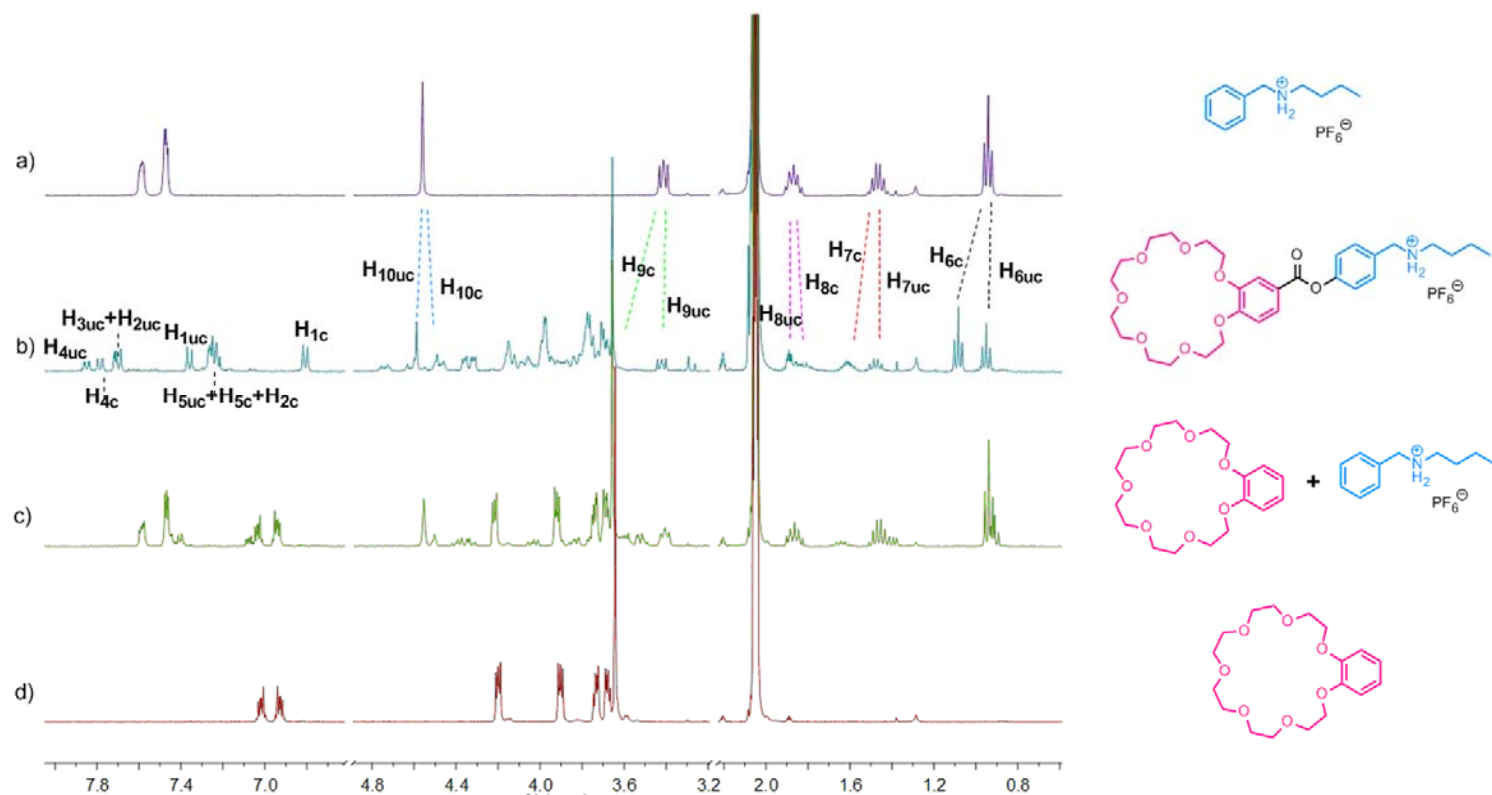

**Figure S11.** Partial proton NMR spectra (400 MHz, acetone- $d_6$ , room temperature) of (a) model secondary ammonium hexafluorophosphate salt (8.00 mM), (b) monomer **1** (8.00 mM), (c) an equimolar mixture of benzo-21-crown-7 and model secondary ammonium hexafluorophosphate salt (8.00 mM), and (d) benzo-21-crown-7 (8.00 mM). “c” and “uc” denote complexed and uncomplexed species, respectively.

7. Partial  $^1\text{H}$ - $^1\text{H}$  COSY NMR spectrum of **1**

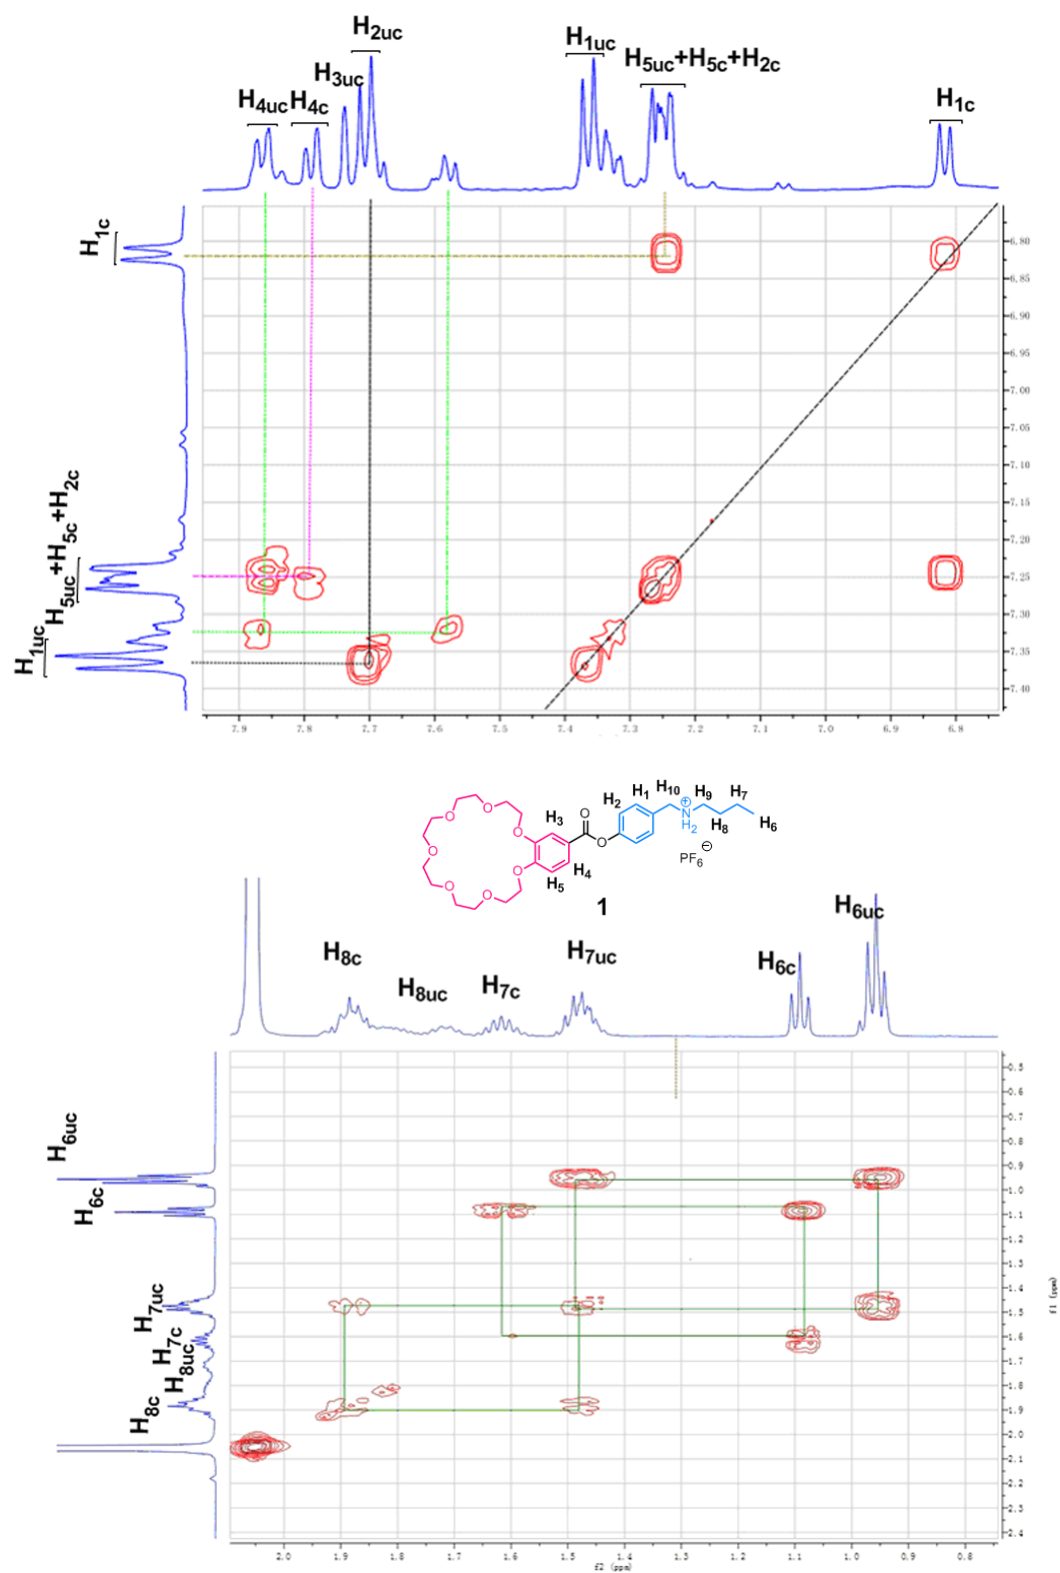

**Figure S12.** Partial  $^1\text{H}$ - $^1\text{H}$  COSY NMR (500 MHz, acetone- $d_6$ , room temperature) spectrum of **1** (40.0 mM).

### 8. Partial NOSEY NMR spectrum of **1**

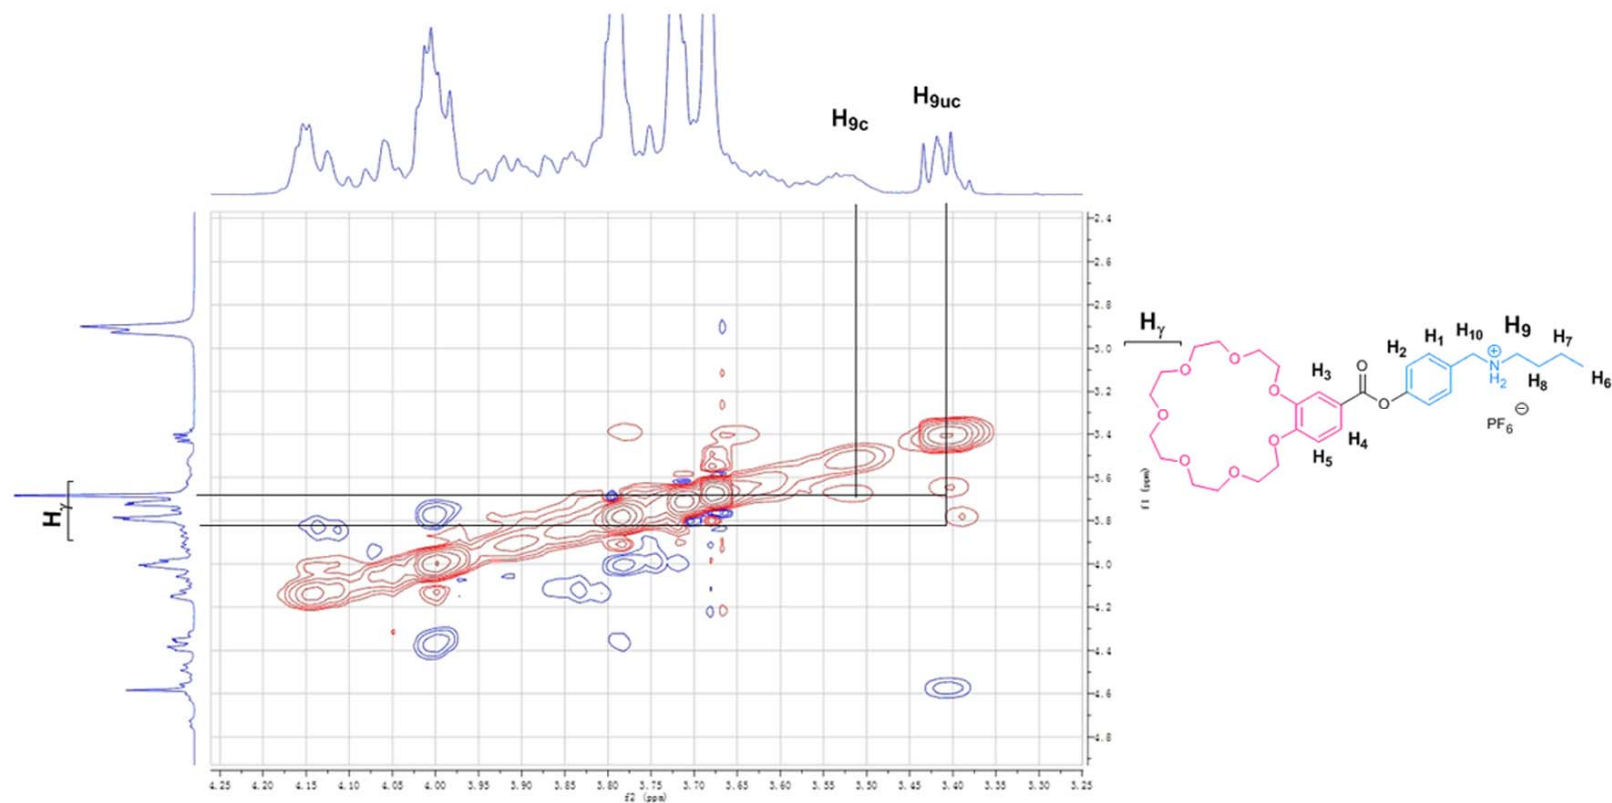

**Figure S13.** Partial NOESY NMR (500 MHz, acetone- $d_6$ , room temperature) spectrum of **1** (40.0 mM). Strong correlations were observed between the protons adjacent to secondary ammonium  $H_9$  and the protons of the polyether macrocyclic ring, suggesting that secondary ammonium salt moieties  $NH_2^+$  is located in the center of the macrocyclic ring.

9. Partial proton NMR spectra of the complexation of **1** controlled by pH value

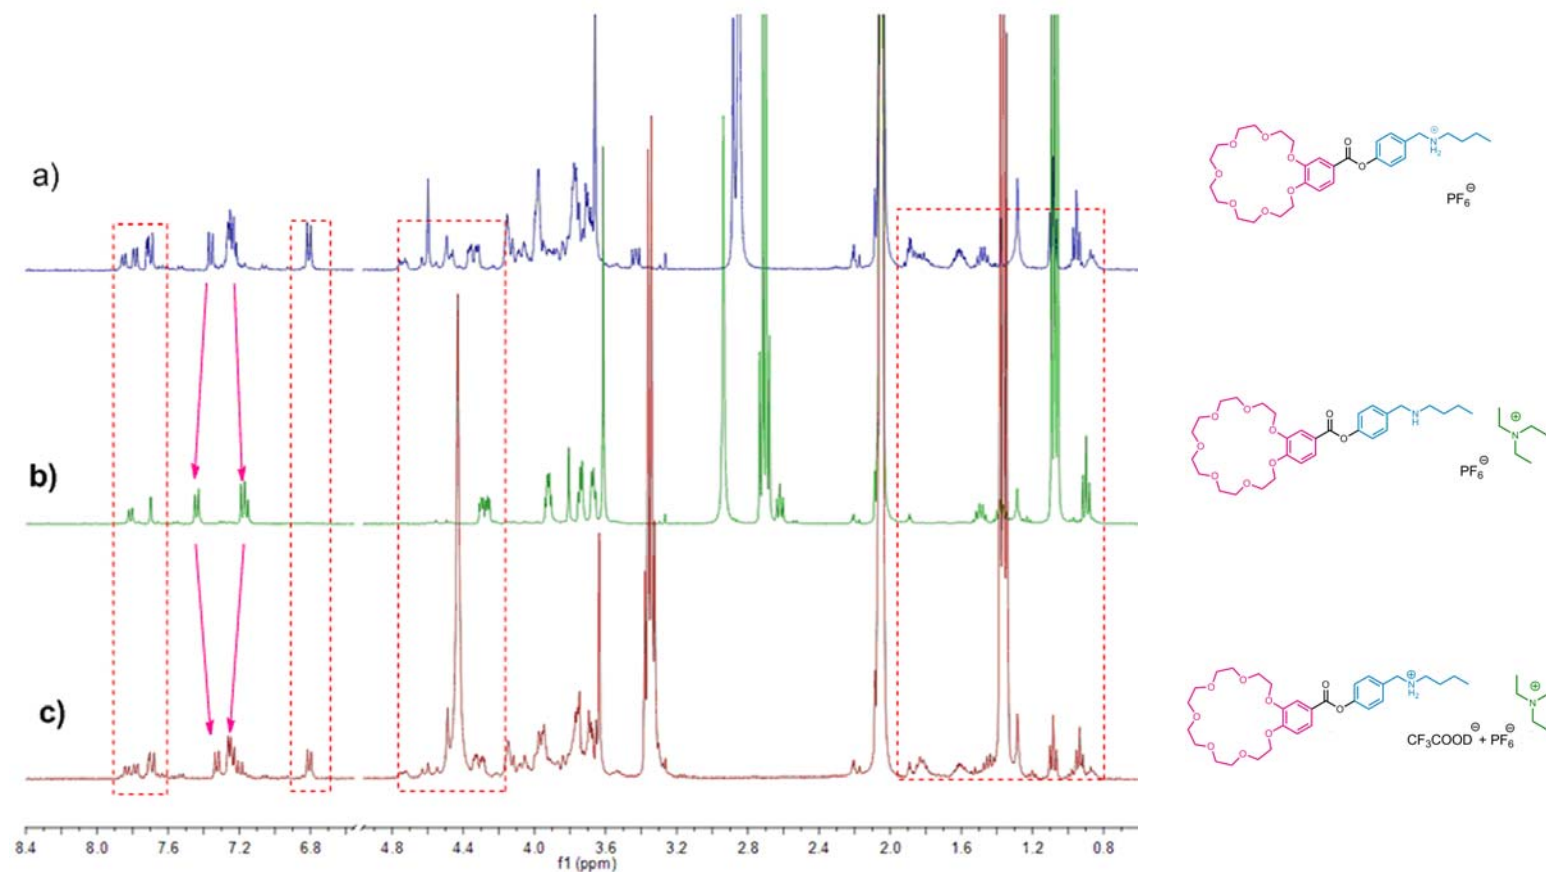

**Figure S14.** Partial  $^1\text{H}$  NMR spectra (400 MHz, acetone- $d_6$ , room temperature) of (a) 8.00 mM compound **1**, (b) 8.00 mM compound **1** and 24.0 mM  $\text{Et}_3\text{N}$ , and (c) 8.00 mM compound **1**, 24.0 mM  $\text{Et}_3\text{N}$  and 32.0 mM  $\text{CF}_3\text{COOD}$ .



10. Partial proton NMR spectra of the complexation of **1** controlled by  $K^+$

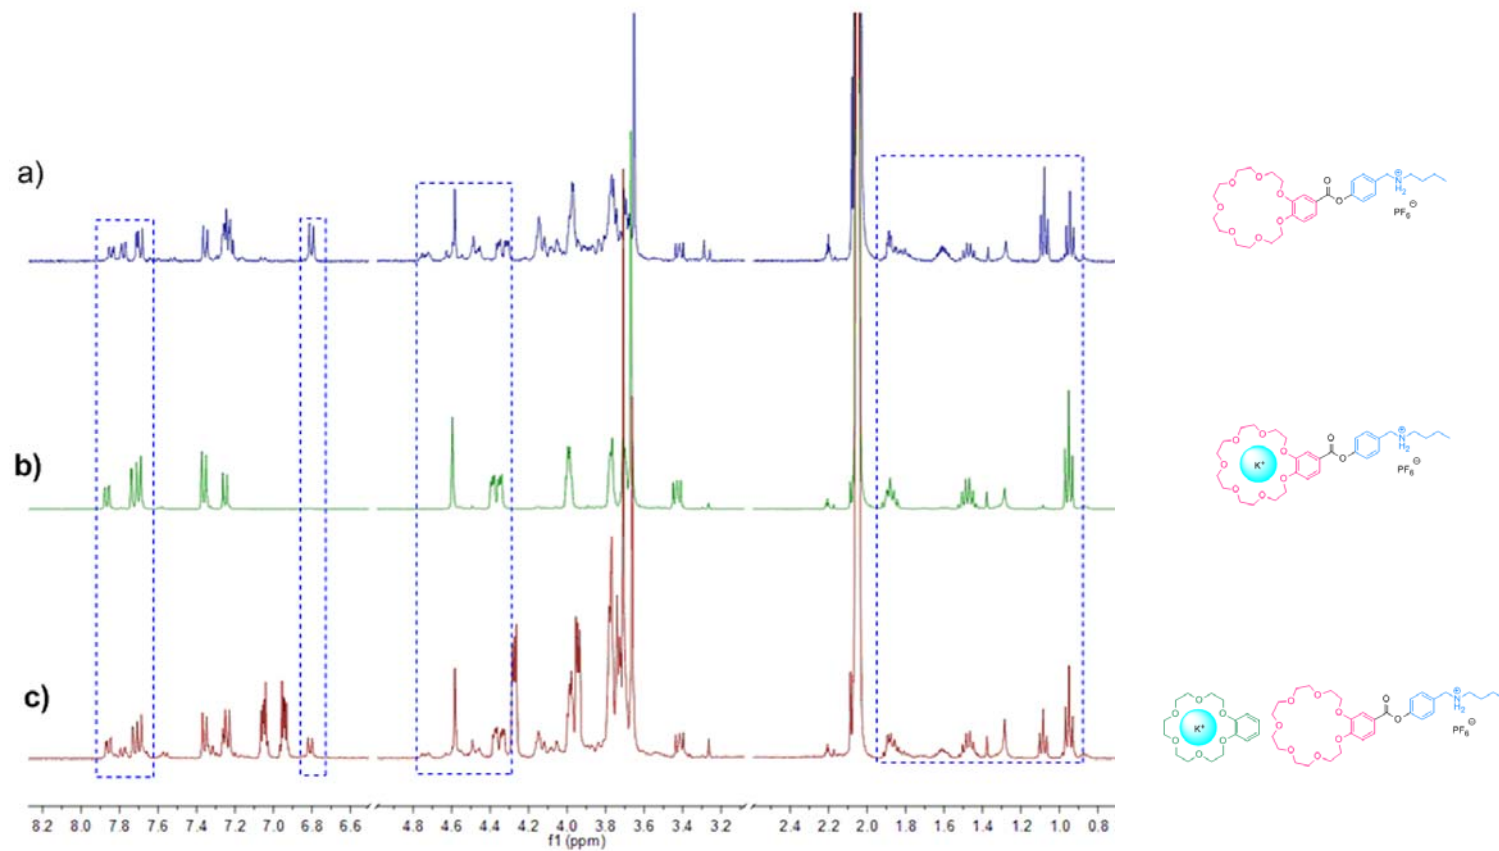

**Figure S15.** Partial  $^1\text{H}$  NMR spectra (400 MHz, acetone- $d_6$ , room temperature) of (a) 8.00 mM compound **1**, (b) 8.00 mM compound **1** and 8.00 mM  $\text{KPF}_6$ , and (c) 8.00 mM compound **1**, 8.00 mM  $\text{KPF}_6$  and 8.00 mM benzo-18-crown-6.

## 11. X-ray analysis data of **1**

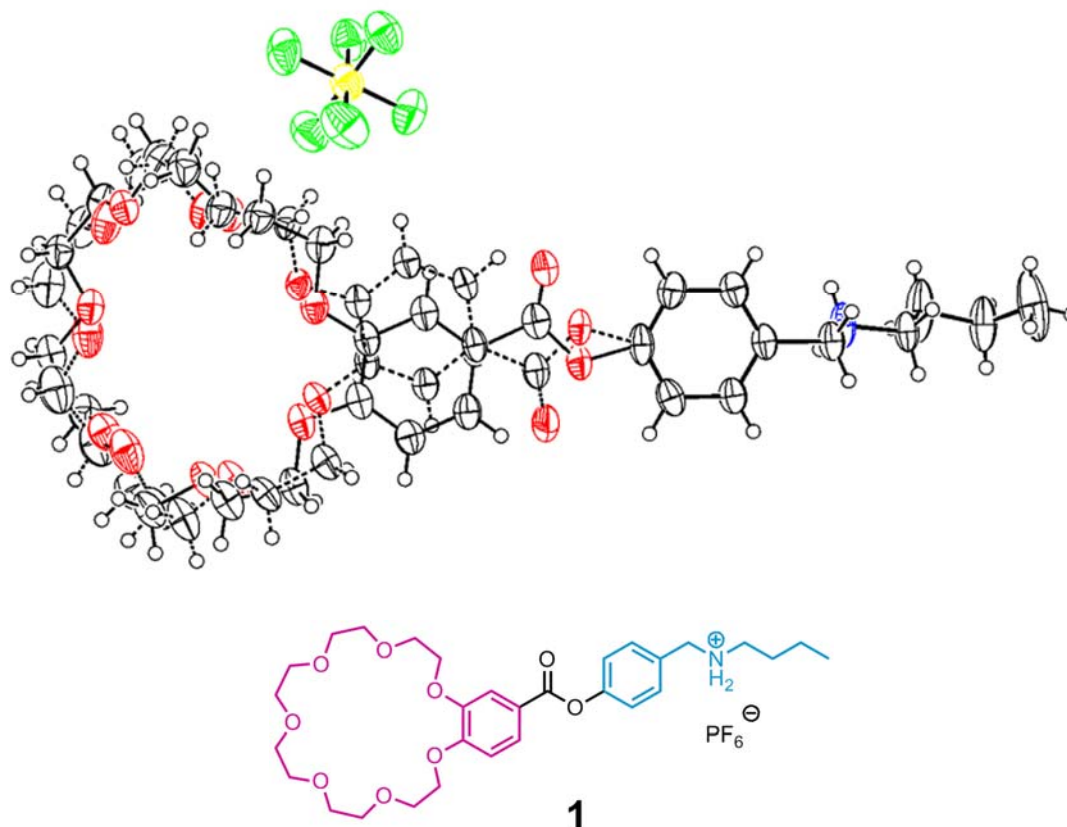

Crystallographic data: block, colorless,  $C_{30}H_{44}NO_9F_6P$ ,  $FW$  707.63, triclinic, space group  $P\bar{1}$ ,  $a = 7.9713(4)$ ,  $b = 11.8560(8)$ ,  $c = 19.9106(13)$  Å,  $\alpha = 89.124(5)^\circ$ ,  $\beta = 87.531(4)^\circ$ ,  $\gamma = 86.362(5)^\circ$ ,  $V = 1876.0(2)$  Å<sup>3</sup>,  $Z = 2$ ,  $D_c = 1.253$  g cm<sup>-3</sup>,  $T = 120(2)$  K,  $\mu = 1.333$  mm<sup>-1</sup>, 6585 measured reflections, 4558 independent reflections, 654 parameters, 2905 restraints,  $F(000) = 744$ ,  $R_1 = 0.0738$ ,  $wR_2 = 0.1110$  (all data),  $R_1 = 0.0528$ ,  $wR_2 = 0.1035$  [ $I > 2\sigma(I)$ ], max. residual density 0.499 e•Å<sup>-3</sup>, and goodness-of-fit ( $F^2$ ) = 1.018.

### References:

- S1. Zhang, C.; Li, S.; Zhang, J.; Zhu, K.; Li, N.; Huang, F. *Org. Lett.* **2007**, *9*, 5553–5556.  
S2. Dong, S.; Luo, Y.; Yan, X.; Zheng, B.; Ding, X.; Yu, Y.; Ma, Z.; Zhao, Q.; Huang, F. *Angew. Chem., Int. Ed.* **2011**, *50*, 1905–1909.
